# Supplementary material for: A spinoparabrachial circuit defined by Tacr1 expression drives pain
Source: eLife. 2021 Feb 16;10:e61135. doi: 10.7554/eLife.61135 (PMC7993995; doi:10.7554/eLife.61135)
Supplement: Source data 1. [file elife-61135-data1.xlsx]

## Sheet: Fig1C
0	39
0	40
0	45
0	50
0	45
0	37
0	44

## Sheet: Fig1D
0	13
0	12
0	10
0	12
0	17
0	16
0	11

## Sheet: Fig1E
2	0
3	0
6	0
7	0
5	0
2	0
5	0

## Sheet: Fig1F
61	0
70	0
106	0
101	0
85	0
66	0
83	0

## Sheet: Fig1G
0.16	0.16
0.4	0.16
0.16	0.4
0.6	0.4
0.4	0.4
0.4	0.4
0.4	0.16

## Sheet: Fig1H
3.27	4.44
3.36	3.6
4.9	4.81
5.3	2.2
4.01	4.72
5.6	3.6
3	4.9

## Sheet: Fig1S1B
3.27	4.44
3.36	3.6
4.9	4.81
5.3	2.2
4.01	4.72
5.6	3.6
3	4.9

## Sheet: Fig1S1C
76	140
82	63
129	111
122	98
118	102
70	125
135	110

## Sheet: Fig1S2B
12	18	68	34	29	6

## Sheet: Fig1S3B
48	333
103	223
122	386
109	452
228	517
111	208
86	355
95	381

[truncated: 41 more sheets: Fig1S4B, Fig1S4D, Fig1S4E, Fig1S4F, Fig1S4G, Fi2C, Fig2G, Fig4C, Fig4D, Fig4E, Fig4F, Fig4G, Fig4H, Fig4S1A, Fig4S1B, Fig4S2A, Fig4S2B, Fig4S2C, Fig4S2D, Fi4S2E …]
